# Supplementary figures and images for: Shotgun mass spectrometry-based lipid profiling identifies and distinguishes between chronic inflammatory diseases
Source: PubMed Central journal article supplement — eBioMedicine. 2021 Jul 24;70:103504. doi: 10.1016/j.ebiom.2021.103504 (PMC8330692; doi:10.1016/j.ebiom.2021.103504), 2021-07-24

**a**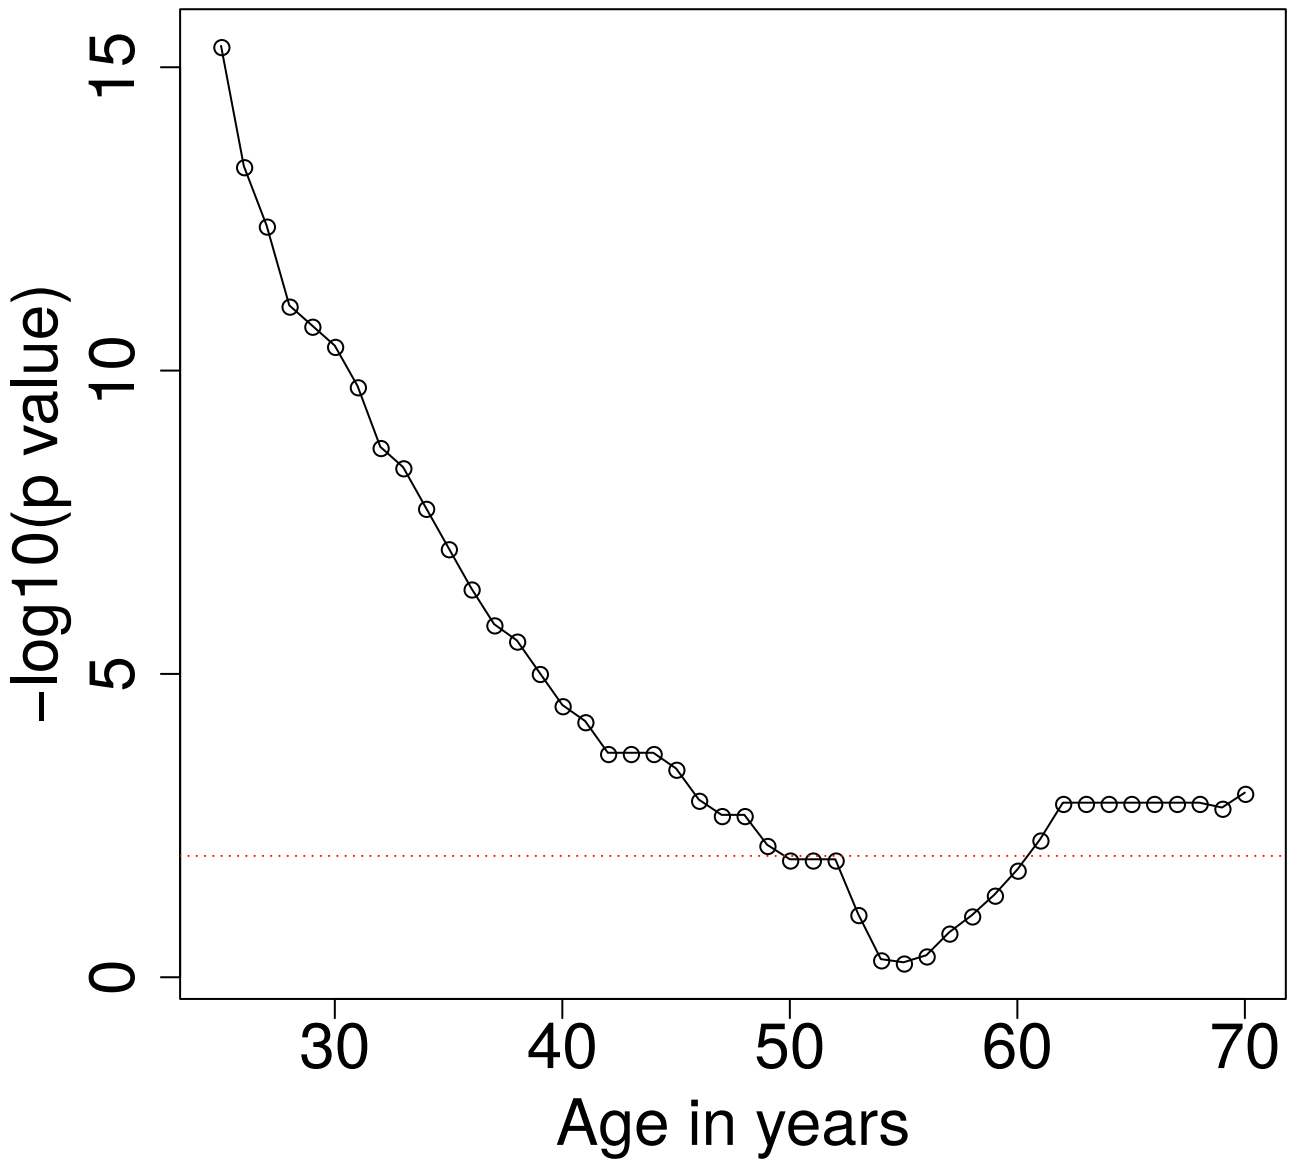**b**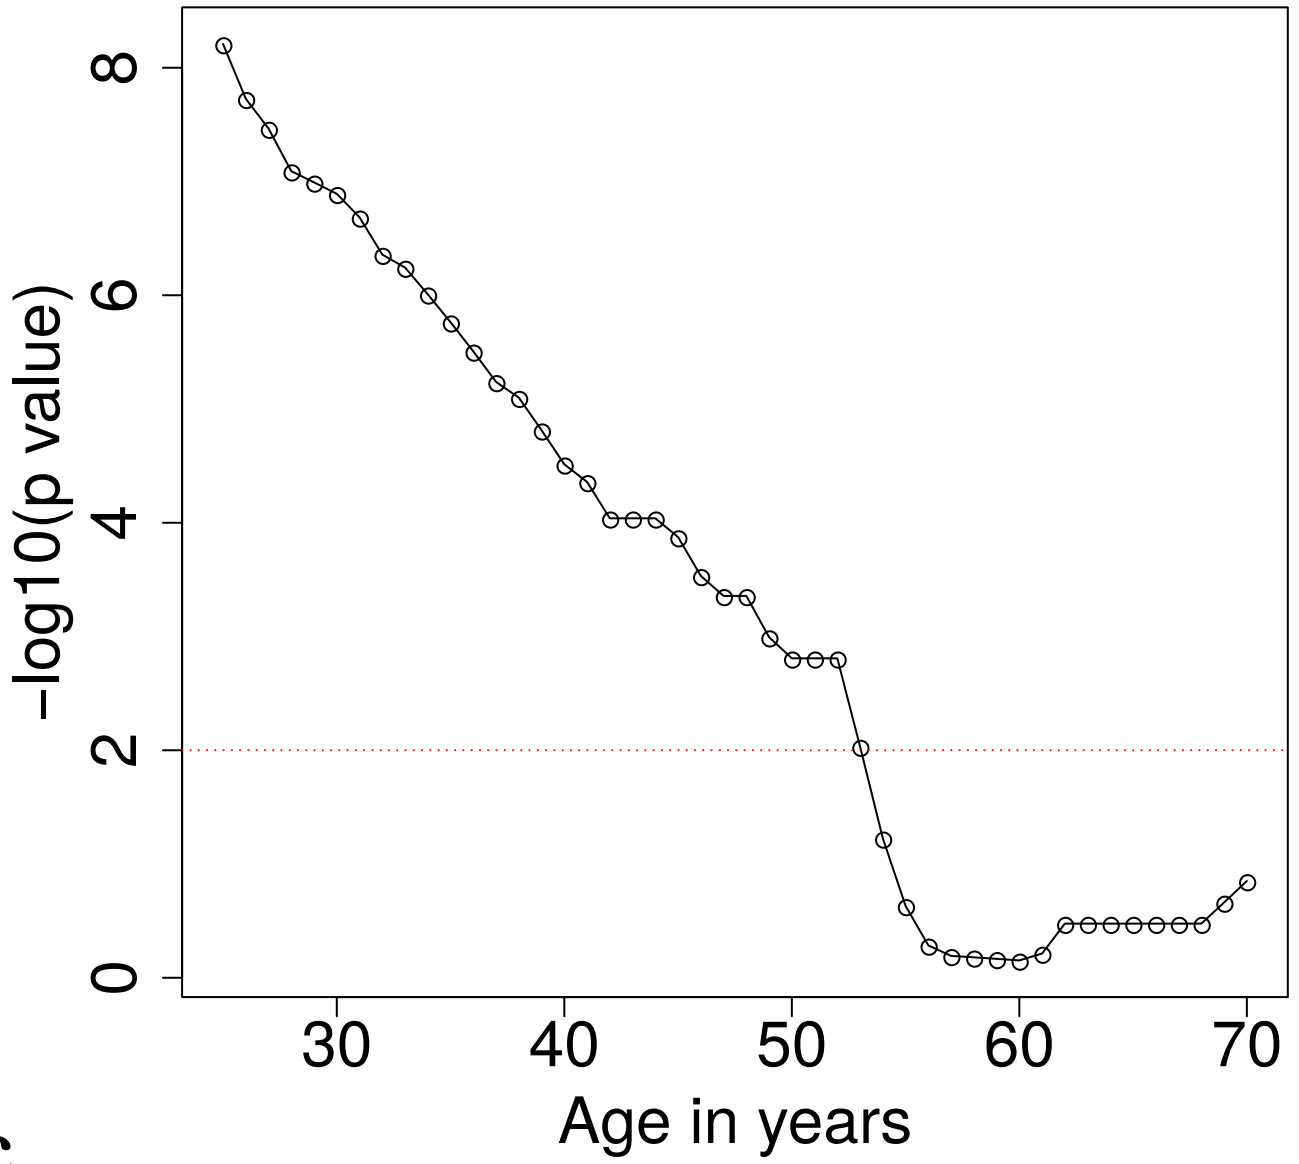**c**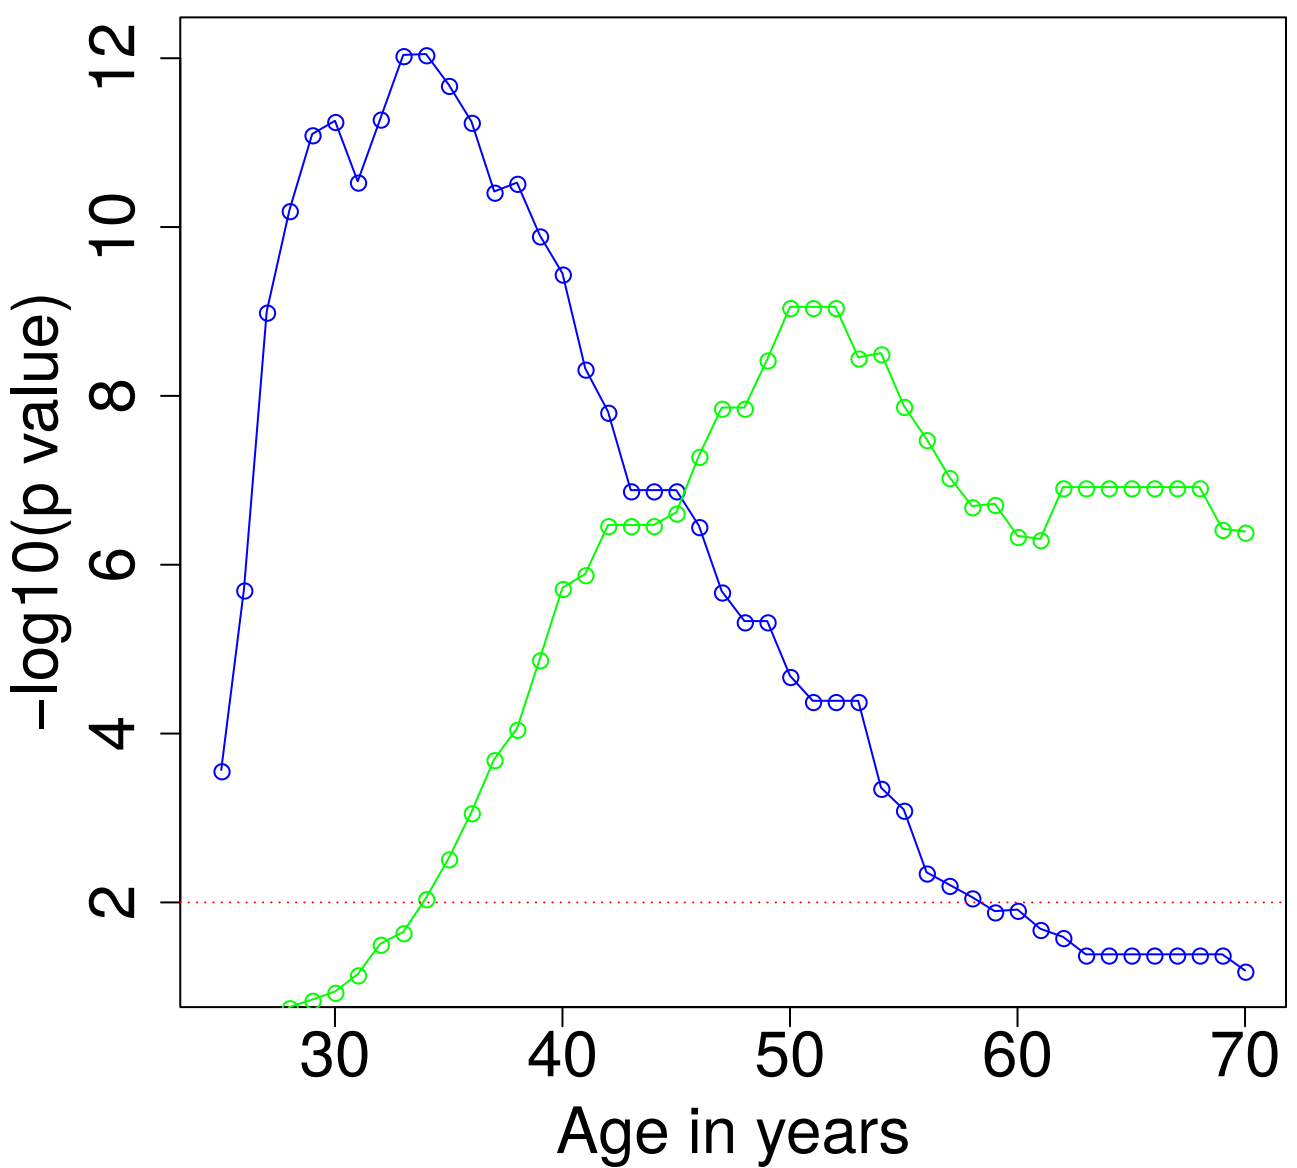

Supplement: mmc5.pdf [file mmc5.pdf]
